# Supplementary material for: circSLCO1B7 suppresses the malignant progression of hepatocellular carcinoma via the miR-556-3p/DAB2IP axis
Source: publisher site journal article supplement (doi:10.18632/aging.205244), 2023-11-24
Supplement: Supplementary file [file aging-v15i22-205244-supplementary-material-SD1.pdf]

## SUPPLEMENTARY TABLES

**Supplementary Table 1. Sequences of the qRT-PCR primers and siRNA used in this study.**

| Gene name       | Forward primer (5'-3')   | Reverse primer (5'-3')   |
|-----------------|--------------------------|--------------------------|
| circSLCO1B7     | ACGTGTATGAAGTGGTCCACCA   | ACCAAGCCACCAAGCTCCAA     |
| SLCO1B7         | CCGGCCTAACCTTGACCTATGATG | ACAGACGGGTCCCATTTGACTTTC |
| DAB2IP          | GCGGCAGTTCGTGGAGAAGTG    | GGCAGGATGGTGATGGTTTGGTAG |
| 18srRNA         | GTAACCCGTTGAACCCCAT      | CCATCCAATCGGTAGTAGCG     |
| $\beta$ -actin  | GAGAAATCTGGCACCACACC     | GGATAGCACAGCCTGGATAGCAA  |
| GAPDH           | GGTATGACAACGAATTTGGC     | GAGCACAGGGTACTTTATTG     |
| si-NC           | UUCUCCGAACGUGUCACGUTT    | ACGUGACACGUUCGGAGAATT    |
| circSLCO1B7 si1 | CCACAUAUUUGGGGCACUATT    | UAGUGCCCCAAAUAUGUGGTT    |
| circSLCO1B7 si2 | CAUAUUUGGGGCACUAUCATT    | UGAUAGUGCCCCAAAUAUGTT    |

**Supplementary Table 2. Sequences of the FISH probes used in this study.**

| Gene name   | Probe (5'-3')                      |
|-------------|------------------------------------|
| circSLCO1B7 | Cy3-GTTATCCTGATAGTGCCCCAAATATGTGGA |
| 18srRNA     | Cy3-CTTCCTTGGATGTGGTAGCCGTTTC      |
